# Supplementary material for: Associative Learning of Stimuli Paired and Unpaired With Reinforcement: Evaluating Evidence From Maggots, Flies, Bees, and Rats
Source: Front Psychol. 2018 Aug 24;9:1494. doi: 10.3389/fpsyg.2018.01494 (PMC6117914; doi:10.3389/fpsyg.2018.01494)
Supplement: Supplementary file 2 [file Data_Sheet_1.xlsx]

## Sheet: Fig. 1
Fig. 1
Fig. 1A																					Fig. 1B									Fig. 1C
Saumweber et al 2011a				Schleyer et al. 2011 (left display)				Schleyer et al. 2011 (right display)				Schleyer et al. 2015b				Paisios et al. 2017					Saumweber et al 2011a (left display)				Saumweber et al 2011a (right display)					Schleyer et al. 2011				Paisios et al. 2017
Training	Test	AM Pref		Training	Test	AM Pref		Training	Test	AM Pref		Training	Test	AM Pref		Training	Test	AM Pref			Training	Test	1-OCT Pref		Training	Test	3-OCT Pref			Training	Test	AM Pref		Training	Test	AM Pref
Paired	PUR	0.9		Paired	PUR	0.466667		Paired	PUR	0.433333		Paired	PUR	0.63		Paired	PUR	0.5			Paired	PUR	0.363636		Paired	PUR	0.258065			Paired	PUR	0.272727		Training	Test	-0.153846
Paired	PUR	0.5		Paired	PUR	0.285714		Paired	PUR	0.185185		Paired	PUR	1		Paired	PUR	0.347826			Paired	PUR	0.516129		Paired	PUR	0.388889			Paired	PUR	-0.3		Paired	PUR	0
Paired	PUR	0.548387		Paired	PUR	0.46875		Paired	PUR	0.347826		Paired	PUR	0.65		Paired	PUR	0.25			Paired	PUR	0.384615		Paired	PUR	0.354839			Paired	PUR	0.483871		Paired	PUR	-0.347826
Paired	PUR	0.125		Paired	PUR	0.612903		Paired	PUR	0.548387		Paired	PUR	0.5		Paired	PUR	0.28			Paired	PUR	-0.151515		Paired	PUR	0.4			Paired	PUR	0.0555556		Paired	PUR	-0.421053
Paired	PUR	0.346154		Paired	PUR	0.03125		Paired	PUR	0.59375		Paired	PUR	0.37		Paired	PUR	0.181818			Paired	PUR	-0.148936		Paired	PUR	0.366667			Paired	PUR	0.0555556		Paired	PUR	-0.0909091
Paired	PUR	0.2		Paired	PUR	0.583333		Paired	PUR	0.392857		Paired	PUR	0.18		Paired	PUR	0.291667			Paired	PUR	-0.09375		Paired	PUR	0.448276			Paired	PUR	-0.333333		Paired	PUR	-0.571429
Paired	PUR	0.137931		Paired	PUR	0.448276		Paired	PUR	0.259259		Paired	PUR	0.62		Paired	PUR	0.208333			Paired	PUR	0.233333		Paired	PUR	-0.0731707			Paired	PUR	-0.0294118		Paired	PUR	-0.333333
Paired	PUR	0.366667		Paired	PUR	0.34375		Paired	PUR	0.346154		Paired	PUR	0.56		Paired	PUR	-0.121951			Paired	PUR	-0.538462		Paired	PUR	0.342857			Paired	PUR	0.137931		Paired	PUR	0.391304
Paired	PUR	0.28		Paired	PUR	0.740741		Paired	PUR	0.16129		Paired	PUR	0.18		Paired	PUR	-0.0833333			Paired	PUR	0.166667		Paired	PUR	0.8125			Paired	PUR	0.4375		Paired	PUR	-0.409091
Paired	PUR	0.473684		Paired	PUR	0.241379		Paired	PUR	0.645161		Paired	PUR	0.56		Paired	PUR	0.16			Paired	PUR	0.47619		Paired	PUR	-0.147059			Paired	PUR	0.272727		Paired	PUR	0.16
Paired	PUR	0.0952381		Paired	PUR	0.633333		Paired	PUR	0.580645		Paired	PUR	0.19		Paired	PUR	-0.0416667			Paired	PUR	-0.1875		Paired	PUR	0.1			Paired	PUR	0.296296		Paired	PUR	-0.6
Paired	PUR	0.137931		Paired	PUR	0.516129		Paired	PUR	0.222222		Paired	PUR	0.41		Paired	PUR	0.391304			Paired	PUR	0.291667		Paired	PUR	0.678571			Paired	PUR	0.424242		Paired	PUR	-0.0909091
Paired	PUR	0.689655		Paired	PUR	0.677419		Paired	PUR	0.428571		Paired	PUR	0.24		Paired	PUR	0.32			Paired	PUR	-0.243243		Paired	PUR	0.413793			Paired	PUR	0.378378		Paired	PUR	0.227273
Paired	PUR	0.555556		Paired	PUR	0.866667		Paired	PUR	0.121212		Paired	PUR	0.29		Paired	PUR	0.44			Paired	PUR	0.296296		Paired	PUR	-0.407407			Paired	PUR	-0.0357143		Paired	PUR	-0.15
Paired	PUR	-0.392857		Paired	PUR	0.428571						Paired	PUR	0.25		Paired	PUR	0.347826			Paired	PUR	0.229167		Paired	PUR	0.5			Paired	PUR	-0.242424		Paired	PUR	0.08
Paired	PUR	0.210526		Paired	PUR	0.75		Unpaired	PUR	-0.6875		Paired	PUR	0.29		Paired	PUR	0.08			Paired	PUR	0.111111		Paired	PUR	0.322581			Paired	PUR	0.305556		Paired	PUR	0.272727
Paired	PUR	0.405405		Paired	PUR	0.529412		Unpaired	PUR	-0.37037		Paired	PUR	0.25		Paired	PUR	0.25			Paired	PUR	0.288889		Paired	PUR	0.592593							Paired	PUR	-0.4
Paired	PUR	0.638889		Paired	PUR	0.657143		Unpaired	PUR	-0.357143		Paired	PUR	0.17		Paired	PUR	-0.0434783			Paired	PUR	0.21875							Unpaired	PUR	0.212121		Paired	PUR	0
Paired	PUR	0.384615		Paired	PUR	0.677419		Unpaired	PUR	-0.0344828		Paired	PUR	0.63		Paired	PUR	0.173913			Paired	PUR	-0.0784314		Unpaired	PUR	-0.0333333			Unpaired	PUR	0.290323		Paired	PUR	-0.125
Paired	PUR	0.357143						Unpaired	PUR	-0.121212		Paired	PUR	0.74		Paired	PUR	0.434783			Paired	PUR	0.0714286		Unpaired	PUR	-0.826087			Unpaired	PUR	0.387097		Paired	PUR	0.173913
Paired	PUR	0.36		Unpaired	PUR	0.0740741		Unpaired	PUR	-0.566667		Paired	PUR	0.39		Paired	PUR	0.473684			Paired	PUR	0.259259		Unpaired	PUR	-0.0967742			Unpaired	PUR	0.030303		Paired	PUR	-0.166667
Paired	PUR	0.155556		Unpaired	PUR	-0.241379		Unpaired	PUR	-0.214286		Paired	PUR	1		Paired	PUR	0.772727			Paired	PUR	0.0227273		Unpaired	PUR	-0.689655			Unpaired	PUR	0.433333		Paired	PUR	0.2
Paired	PUR	0.711864		Unpaired	PUR	-0.258065		Unpaired	PUR	-0.266667		Paired	PUR	0.29		Paired	PUR	0.73913			Paired	PUR	0.666667		Unpaired	PUR	-0.833333			Unpaired	PUR	0.307692		Paired	PUR	0.304348
Paired	PUR	-0.0294118		Unpaired	PUR	-0.393939		Unpaired	PUR	-0.266667		Paired	PUR	0.62		Paired	PUR	0.47619			Paired	PUR	-0.5		Unpaired	PUR	-0.1875			Unpaired	PUR	0		Paired	PUR	0.0555556
Paired	PUR	0.810811		Unpaired	PUR	-0.0606061		Unpaired	PUR	-0.0294118		Paired	PUR	0.64		Paired	PUR	0			Paired	PUR	0.222222		Unpaired	PUR	-0.171429			Unpaired	PUR	-0.517241		Paired	PUR	-0.3
Paired	PUR	0.72		Unpaired	PUR	-0.0384615		Unpaired	PUR	-0.612903		Paired	PUR	0.38							Paired	PUR	-0.0344828		Unpaired	PUR	-0.576923			Unpaired	PUR	0.0454545		Paired	PUR	0.125
Paired	PUR	0.513514		Unpaired	PUR	0.241379		Unpaired	PUR	-0.172414		Paired	PUR	0.33		Unpaired	PUR	-0.565217			Paired	PUR	0.15625		Unpaired	PUR	-0.615385			Unpaired	PUR	-0.0882353
Paired	PUR	0.153846		Unpaired	PUR	0.0909091		Unpaired	PUR	-0.0967742		Paired	PUR	0.38		Unpaired	PUR	-0.12			Paired	PUR	-0.047619		Unpaired	PUR	0.0625			Unpaired	PUR	0.310345		Unpaired	PUR	-0.173913
				Unpaired	PUR	-0.178571		Unpaired	PUR	-0.2		Paired	PUR	0.5		Unpaired	PUR	-0.291667			Paired	PUR	-0.0285714		Unpaired	PUR	-0.212121			Unpaired	PUR	0.151515		Unpaired	PUR	0.173913
Unpaired	PUR	-0.740741		Unpaired	PUR	-0.407407						Paired	PUR	0.75		Unpaired	PUR	-0.2							Unpaired	PUR	-0.258065			Unpaired	PUR	0.666667		Unpaired	PUR	-0.2
Unpaired	PUR	0.5		Unpaired	PUR	-0.3125		Paired	FRU	0.34375		Paired	PUR	0.7		Unpaired	PUR	-0.541667			Unpaired	PUR	-0.708333		Unpaired	PUR	-0.392857			Unpaired	PUR	-0.0714286		Unpaired	PUR	0.227273
Unpaired	PUR	0.3		Unpaired	PUR	-0.285714		Paired	FRU	-0.6		Paired	PUR	0.3		Unpaired	PUR	-0.16			Unpaired	PUR	-0.294118		Unpaired	PUR	-0.333333			Unpaired	PUR	0.0967742		Unpaired	PUR	0.0833333
Unpaired	PUR	0.304348		Unpaired	PUR	-0.416667		Paired	FRU	0.526316		Paired	PUR	0.06		Unpaired	PUR	-0.416667			Unpaired	PUR	-0.769231		Unpaired	PUR	-0.733333			Unpaired	PUR	0.575758		Unpaired	PUR	0
Unpaired	PUR	-0.111111		Unpaired	PUR	-0.5		Paired	FRU	0.5		Paired	PUR	0.5		Unpaired	PUR	-0.583333			Unpaired	PUR	0.0740741		Unpaired	PUR	-0.1875							Unpaired	PUR	0.375
Unpaired	PUR	-0.32		Unpaired	PUR	-0.857143		Paired	FRU	0.0333333		Paired	PUR	0.33		Unpaired	PUR	-0.375			Unpaired	PUR	-0.875		Unpaired	PUR	-0.677419			Paired	QUI	0.8125		Unpaired	PUR	-0.25
Unpaired	PUR	0.1		Unpaired	PUR	0.2		Paired	FRU	-0.16129		Paired	PUR	0.33		Unpaired	PUR	-0.0416667			Unpaired	PUR	-0.526316							Paired	QUI	0.275862		Unpaired	PUR	0.173913
Unpaired	PUR	0		Unpaired	PUR	0.1875		Paired	FRU	-0.0384615		Paired	PUR	0.58		Unpaired	PUR	-0.5			Unpaired	PUR	-0.611111		Paired	FRU	0.129032			Paired	QUI	0.125		Unpaired	PUR	-0.04
Unpaired	PUR	-0.234043		Unpaired	PUR	-0.142857		Paired	FRU	0.0344828		Paired	PUR	0.08		Unpaired	PUR	-0.5			Unpaired	PUR	-0.0645161		Paired	FRU	0.0333333			Paired	QUI	0.1		Unpaired	PUR	-0.333333
Unpaired	PUR	0.16		Unpaired	PUR	-0.393939		Paired	FRU	0.266667		Paired	PUR	0.33		Unpaired	PUR	-0.458333			Unpaired	PUR	-0.538462		Paired	FRU	0.34375			Paired	QUI	0.285714		Unpaired	PUR	-0.5
Unpaired	PUR	-0.114286						Paired	FRU	-0.37931		Paired	PUR	0.65		Unpaired	PUR	-0.3			Unpaired	PUR	-0.322581		Paired	FRU	0.233333			Paired	QUI	0.515152		Unpaired	PUR	0.217391
Unpaired	PUR	0.277778		Paired	FRU	0.0344828		Paired	FRU	0.0357143						Unpaired	PUR	-0.5			Unpaired	PUR	-0.0857143		Paired	FRU	-0.375			Paired	QUI	0.34375		Unpaired	PUR	-0.24
Unpaired	PUR	0.03125		Paired	FRU	0.162162		Paired	FRU	0.15625		Unpaired	PUR	0		Unpaired	PUR	-0.217391			Unpaired	PUR	-0.592593		Paired	FRU	0.0344828			Paired	QUI	0.741935		Unpaired	PUR	0.125
Unpaired	PUR	-0.176471		Paired	FRU	0.205882		Paired	FRU	-0.0909091		Unpaired	PUR	0.04		Unpaired	PUR	-0.583333			Unpaired	PUR	-0.289474		Paired	FRU	-0.375			Paired	QUI	0.875		Unpaired	PUR	0
Unpaired	PUR	-0.310345		Paired	FRU	0.285714		Paired	FRU	-0.333333		Unpaired	PUR	-0.13		Unpaired	PUR	-0.636364			Unpaired	PUR	-0.365854		Paired	FRU	-0.444444			Paired	QUI	0.714286		Unpaired	PUR	0.388889
Unpaired	PUR	0.160714		Paired	FRU	0.40625		Paired	FRU	0.192308		Unpaired	PUR	0.24		Unpaired	PUR	-0.48			Unpaired	PUR	-0.810811		Paired	FRU	0.4375			Paired	QUI	0.571429		Unpaired	PUR	0.0416667
Unpaired	PUR	-0.333333		Paired	FRU	0.235294		Paired	FRU	0.233333		Unpaired	PUR	0		Unpaired	PUR	-0.12			Unpaired	PUR	-0.419355		Paired	FRU	-0.322581			Paired	QUI	0.823529		Unpaired	PUR	-0.0833333
Unpaired	PUR	-0.28125		Paired	FRU	0.184211						Unpaired	PUR	-0.57		Unpaired	PUR	-0.263158			Unpaired	PUR	-0.236842		Paired	FRU	0.433333			Paired	QUI	0.125		Unpaired	PUR	0.136364
Unpaired	PUR	-0.0714286		Paired	FRU	0.0606061		Unpaired	FRU	-0.294118		Unpaired	PUR	0		Unpaired	PUR	-0.761905			Unpaired	PUR	0.0571429		Paired	FRU	0.0333333			Paired	QUI	-0.0333333		Unpaired	PUR	-0.0909091
Unpaired	PUR	-0.454545		Paired	FRU	0.176471		Unpaired	FRU	0.037037		Unpaired	PUR	-0.38		Unpaired	PUR	-0.652174			Unpaired	PUR	-0.114286		Paired	FRU	-0.414634			Paired	QUI	0.787879		Unpaired	PUR	0.25
Unpaired	PUR	-0.416667		Paired	FRU	0.16129		Unpaired	FRU	0.307692		Unpaired	PUR	0.38		Unpaired	PUR	-0.590909			Unpaired	PUR	0.0666667		Paired	FRU	0.285714			Paired	QUI	0.535714		Unpaired	PUR	-0.391304
Unpaired	PUR	-0.6		Paired	FRU	0.181818		Unpaired	FRU	-0.3		Unpaired	PUR	0		Unpaired	PUR	-0.555556			Unpaired	PUR	-0.382979		Paired	FRU	-0.193548							Unpaired	PUR	0.0454545
Unpaired	PUR	-0.0322581		Paired	FRU	0.0967742		Unpaired	FRU	-0.214286		Unpaired	PUR	0							Unpaired	PUR	-0.411765		Paired	FRU	-0.08			Unpaired	QUI	-0.225806		Unpaired	PUR	0.2
Unpaired	PUR	-0.106383		Paired	FRU	-0.030303		Unpaired	FRU	0.129032		Unpaired	PUR	-0.17		Paired	FRU	0.272727			Unpaired	PUR	-0.416667							Unpaired	QUI	0.16129		Unpaired	PUR	-0.5
Unpaired	PUR	0.411765		Paired	FRU	0.4375		Unpaired	FRU	-0.413793		Unpaired	PUR	0.09		Paired	FRU	-0.0833333			Unpaired	PUR	-0.264151		Unpaired	FRU	-0.272727			Unpaired	QUI	0.392857
Unpaired	PUR	-0.555556		Paired	FRU	0.212121		Unpaired	FRU	0.206897		Unpaired	PUR	0.18		Paired	FRU	-0.0952381			Unpaired	PUR	0.128205		Unpaired	FRU	-0.133333			Unpaired	QUI	-0.53125		Paired	QUI	-0.409091
Unpaired	PUR	-0.0333333		Paired	FRU	0.162162		Unpaired	FRU	0.518519		Unpaired	PUR	-0.25		Paired	FRU	0.12			Unpaired	PUR	-0.5		Unpaired	FRU	-0.275862			Unpaired	QUI	-0.1		Paired	QUI	-0.142857
Unpaired	PUR	0.0810811						Unpaired	FRU	-0.448276		Unpaired	PUR	0.1		Paired	FRU	0.12			Unpaired	PUR	-0.0294118		Unpaired	FRU	0.0666667			Unpaired	QUI	-0.0294118		Paired	QUI	-0.125
Unpaired	PUR	-0.230769		Unpaired	FRU	-0.264706		Unpaired	FRU	-0.178571		Unpaired	PUR	0.37		Paired	FRU	0.24			Unpaired	PUR	-0.419355		Unpaired	FRU	0.321429			Unpaired	QUI	-0.0606061		Paired	QUI	-0.25
				Unpaired	FRU	0.233333		Unpaired	FRU	0.393939		Unpaired	PUR	0.32		Paired	FRU	-0.0416667			Unpaired	PUR	-0.5		Unpaired	FRU	0.264706			Unpaired	QUI	-0.323529		Paired	QUI	-0.48
Paired	FRU	0.137931		Unpaired	FRU	-0.354839		Unpaired	FRU	0		Unpaired	PUR	0.04		Paired	FRU	0.0869565							Unpaired	FRU	-0.26087			Unpaired	QUI	0.354839		Paired	QUI	-0.153846
Paired	FRU	-0.030303		Unpaired	FRU	0.264706		Unpaired	FRU	0.16129		Unpaired	PUR	-0.33		Paired	FRU	0.291667			Paired	FRU	-0.0882353		Unpaired	FRU	0.277778			Unpaired	QUI	-0.387097		Paired	QUI	-0.48
Paired	FRU	0.384615		Unpaired	FRU	0.617647		Unpaired	FRU	0.269231		Unpaired	PUR	0.08		Paired	FRU	0.166667			Paired	FRU	-0.6		Unpaired	FRU	-0.2			Unpaired	QUI	-0.233333		Paired	QUI	-0.416667
Paired	FRU	0.181818		Unpaired	FRU	-0.117647		Unpaired	FRU	0.413793		Unpaired	PUR	-0.28		Paired	FRU	0.0909091			Paired	FRU	0.103448		Unpaired	FRU	0.517241			Unpaired	QUI	0.103448		Paired	QUI	-0.217391
Paired	FRU	0.0666667		Unpaired	FRU	0.225806						Unpaired	PUR	0.05		Paired	FRU	0.434783			Paired	FRU	-0.536585		Unpaired	FRU	0			Unpaired	QUI	0.272727		Paired	QUI	-0.458333
Paired	FRU	-0.0333333		Unpaired	FRU	0.0384615						Unpaired	PUR	-0.25		Paired	FRU	0.347826			Paired	FRU	-0.5		Unpaired	FRU	0.535714			Unpaired	QUI	-0.392857		Paired	QUI	-0.32
Paired	FRU	0.255319		Unpaired	FRU	-0.212121						Unpaired	PUR	0.31		Paired	FRU	-0.0416667			Paired	FRU	-0.208333		Unpaired	FRU	0.5			Unpaired	QUI	-0.310345		Paired	QUI	-0.44
Paired	FRU	-0.139535		Unpaired	FRU	-0.388889						Unpaired	PUR	0.06		Paired	FRU	-0.291667			Paired	FRU	-0.375		Unpaired	FRU	0.2			Unpaired	QUI	-0.111111		Paired	QUI	-0.4
Paired	FRU	0		Unpaired	FRU	0.485714						Unpaired	PUR	0.27		Paired	FRU	0.130435			Paired	FRU	0.09375		Unpaired	FRU	0.30303							Paired	QUI	-0.12
Paired	FRU	0.363636		Unpaired	FRU	0.3125						Unpaired	PUR	0		Paired	FRU	-0.08			Paired	FRU	0.192308		Unpaired	FRU	0.0263158							Paired	QUI	-0.583333
Paired	FRU	-0.117647		Unpaired	FRU	0.352941						Unpaired	PUR	0.8		Paired	FRU	-0.0909091			Paired	FRU	0.04											Paired	QUI	-0.44
Paired	FRU	0.46875		Unpaired	FRU	-0.0588235						Unpaired	PUR	0.22		Paired	FRU	0.130435			Paired	FRU	-0.444444											Paired	QUI	-0.391304
Paired	FRU	-0.0333333		Unpaired	FRU	0.151515						Unpaired	PUR	0.12		Paired	FRU	0.227273			Paired	FRU	0.0350877											Paired	QUI	-0.05
Paired	FRU	0.222222		Unpaired	FRU	-0.181818						Unpaired	PUR	-0.06		Paired	FRU	0.166667			Paired	FRU	-0.0869565											Paired	QUI	-0.24
Paired	FRU	-0.166667										Unpaired	PUR	-0.35		Paired	FRU	0.181818			Paired	FRU	-0.0298507											Paired	QUI	-0.235294
Paired	FRU	-0.08										Unpaired	PUR	0.36		Paired	FRU	0.047619			Paired	FRU	0.193548											Paired	QUI	-0.533333
Paired	FRU	-0.0344828										Unpaired	PUR	-0.24		Paired	FRU	0.0909091			Paired	FRU	-0.4											Paired	QUI	-0.166667
Paired	FRU	0.388889										Unpaired	PUR	0.35		Paired	FRU	0																Paired	QUI	-0.944444
Paired	FRU	-0.333333										Unpaired	PUR	-0.1							Unpaired	FRU	-0.666667											Paired	QUI	0.210526
Paired	FRU	0.551724										Unpaired	PUR	-0.06		Unpaired	FRU	0.130435			Unpaired	FRU	-0.296296											Paired	QUI	-0.6
												Unpaired	PUR	0.31		Unpaired	FRU	-0.421053			Unpaired	FRU	-0.478261											Paired	QUI	-0.142857
Unpaired	FRU	-0.515152										Unpaired	PUR	0		Unpaired	FRU	-0.0869565			Unpaired	FRU	-0.580645											Paired	QUI	-0.0689655
Unpaired	FRU	0.32														Unpaired	FRU	0.375			Unpaired	FRU	-0.027027
Unpaired	FRU	0.0294118										Paired	FRU	0.07		Unpaired	FRU	-0.12			Unpaired	FRU	0											Unpaired	QUI	0.26087
Unpaired	FRU	0.0454545										Paired	FRU	-0.24		Unpaired	FRU	0.04			Unpaired	FRU	-0.551724											Unpaired	QUI	0.416667
Unpaired	FRU	-0.030303										Paired	FRU	0.09		Unpaired	FRU	-0.0833333			Unpaired	FRU	0.147059											Unpaired	QUI	0
Unpaired	FRU	-0.181818										Paired	FRU	0.32		Unpaired	FRU	0.0833333			Unpaired	FRU	-0.0666667											Unpaired	QUI	-0.208333
Unpaired	FRU	-0.193548										Paired	FRU	0.14		Unpaired	FRU	-0.304348			Unpaired	FRU	-0.115385											Unpaired	QUI	0.0869565
Unpaired	FRU	0.137931										Paired	FRU	0.47		Unpaired	FRU	0.173913			Unpaired	FRU	-0.0857143											Unpaired	QUI	0.0454545
Unpaired	FRU	0.0625										Paired	FRU	-0.29		Unpaired	FRU	-0.0434783			Unpaired	FRU	0.116883											Unpaired	QUI	0.5
Unpaired	FRU	-0.2										Paired	FRU	0.23		Unpaired	FRU	0.16			Unpaired	FRU	-0.0322581											Unpaired	QUI	0.36
Unpaired	FRU	-0.1875										Paired	FRU	0.15		Unpaired	FRU	-0.16			Unpaired	FRU	-0.375											Unpaired	QUI	0.173913
Unpaired	FRU	0.6										Paired	FRU	0.69		Unpaired	FRU	0.333333			Unpaired	FRU	0.324324											Unpaired	QUI	-0.0454545
Unpaired	FRU	0.363636										Paired	FRU	0.33		Unpaired	FRU	0.217391																Unpaired	QUI	0.458333
Unpaired	FRU	0										Paired	FRU	0.5		Unpaired	FRU	0.625																Unpaired	QUI	-0.25
Unpaired	FRU	0										Paired	FRU	0.29		Unpaired	FRU	0.08																Unpaired	QUI	-0.28
Unpaired	FRU	0.133333										Paired	FRU	0.25		Unpaired	FRU	0.130435																Unpaired	QUI	0.521739
Unpaired	FRU	0.433333										Paired	FRU	0.13		Unpaired	FRU	0.12																Unpaired	QUI	-0.0416667
Unpaired	FRU	0.212121										Paired	FRU	0		Unpaired	FRU	0.208333																Unpaired	QUI	0.291667
												Paired	FRU	0.66		Unpaired	FRU	0.315789																Unpaired	QUI	-0.0869565
												Paired	FRU	0.26		Unpaired	FRU	-0.136364																Unpaired	QUI	0.541667
												Paired	FRU	0.8		Unpaired	FRU	-0.1																Unpaired	QUI	0.428571
												Paired	FRU	0.08		Unpaired	FRU	0.315789																Unpaired	QUI	0.434783
												Paired	FRU	0.37		Unpaired	FRU	0.2																Unpaired	QUI	0.277778
												Paired	FRU	0.24																				Unpaired	QUI	0.7
												Paired	FRU	0.27																				Unpaired	QUI	0.304348
												Paired	FRU	0.23																				Unpaired	QUI	0.272727
												Paired	FRU	0.56																				Unpaired	QUI	0.0952381
												Paired	FRU	0.64																				Unpaired	QUI	0.35
												Paired	FRU	-0.12																				Unpaired	QUI	0.166667
												Paired	FRU	0.54
												Paired	FRU	0.21
												Paired	FRU	0.08
												Paired	FRU	0.56
												Paired	FRU	0.26
												Paired	FRU	0.22
												Paired	FRU	0.09
												Paired	FRU	0.16
												Paired	FRU	0.14
												Paired	FRU	0.21
												Paired	FRU	-0.04
												Paired	FRU	0.3
												Paired	FRU	0.1
												Unpaired	FRU	0.35359
												Unpaired	FRU	-0.19995
												Unpaired	FRU	0.16227
												Unpaired	FRU	-0.028352
												Unpaired	FRU	0.30865
												Unpaired	FRU	0.10185
												Unpaired	FRU	0.14845
												Unpaired	FRU	0.44052
												Unpaired	FRU	-0.16701
												Unpaired	FRU	0.31334
												Unpaired	FRU	0.20203
												Unpaired	FRU	0.029799
												Unpaired	FRU	-0.074292
												Unpaired	FRU	-0.041722
												Unpaired	FRU	0.36203
												Unpaired	FRU	-0.21532
												Unpaired	FRU	0.19086
												Unpaired	FRU	-0.24735
												Unpaired	FRU	0.29489
												Unpaired	FRU	0.079285
												Unpaired	FRU	0.088034
												Unpaired	FRU	0.19096
												Unpaired	FRU	0.34468
												Unpaired	FRU	0.25589
												Unpaired	FRU	-0.068888
												Unpaired	FRU	0.26853
												Unpaired	FRU	-0.012333
												Unpaired	FRU	0.17225
												Unpaired	FRU	-0.12961
												Unpaired	FRU	-0.20061
												Unpaired	FRU	0.14016
												Unpaired	FRU	0.24221
												Unpaired	FRU	0.35855
												Unpaired	FRU	-0.083811
												Unpaired	FRU	-0.020352
												Unpaired	FRU	0.64066
												Unpaired	FRU	0.28689
												Unpaired	FRU	-0.083887
												Unpaired	FRU	0.11155
												Unpaired	FRU	0.42993

## Sheet: Fig. 2
Fig. 2
Fig. 2A													Fig. 2B
Schleyer et al. 2011 (left display)			Schleyer et al. 2011 (right display)			Schleyer et al. 2015a			Paisios et al. 2017				Schleyer et al. 2011 (left display)			Schleyer et al. 2011 (right display)			Schleyer et al. 2015a
Test Substrate	AM Pref		Test Substrate	AM Pref		Test Substrate	AM Pref		Test Substrate	AM Pref			Test Substrate	1-OCT Pref		Test Substrate	1-OCT Pref		Test Substrate	1-OCT Pref
PUR	-0.312		PUR	0.3		PUR	0.3125		PUR	-0.0952381			PUR	0.533		PUR	0.433333		PUR	0.6875
PUR	0.4		PUR	-0.2		PUR	0.285714		PUR	0.15			PUR	0.4		PUR	-0.0333333		PUR	0.354839
PUR	0.241		PUR	0.266667		PUR	0.793103		PUR	0.1			PUR	0.677		PUR	0.133333		PUR	0.566667
PUR	0.724		PUR	0.3		PUR	0.642857		PUR	0.2			PUR	0.548		PUR	0.566667		PUR	0.333333
PUR	0.355		PUR	0.233333		PUR	0.44		PUR	0.1			PUR	0.467		PUR	0.1		PUR	0.535714
PUR	0.419		PUR	0.533333		PUR	0.392857		PUR	-0.25			PUR	0.241		PUR	-0.1		PUR	0.678571
PUR	0.172		PUR	0.333333		PUR	0.461538		PUR	0.1			PUR	0.4		PUR	0.0666667		PUR	0.625
PUR	-0.032		PUR	0.133333		PUR	0.310345		PUR	0.5			PUR	-0.034		PUR	0.266667		PUR	0.724138
PUR	0.241		PUR	0.2		PUR	0.724138		PUR	0			PUR	0.467		PUR	0.0333333		PUR	0.851852
PUR	0.4		PUR	-0.133333		PUR	0.225806		PUR	-0.05			PUR	0.484		PUR	-0.266667		PUR	0.714286
PUR	0.517		PUR	0.166667		PUR	0.433333		PUR	-0.428571			PUR	0.655		PUR	0		PUR	0.823529
PUR	0.379		PUR	0.4		PUR	0.551724		PUR	-0.4			PUR	0.533		PUR	0.0344828		PUR	0.538462
PUR	0.29		PUR	0.166667		PUR	0.310345		PUR	-0.25			PUR	0.742		PUR	0.2		PUR	0.851852
PUR	0.484		PUR	0.333333		PUR	0.481481		PUR	0.45			PUR	0.226		PUR	-0.0333333		PUR	0.636364
PUR	0.677		PUR	-0.166667		PUR	0.769231		PUR	-0.25			PUR	0.312		PUR	0.5		PUR	0.962963
PUR	0.2		PUR	0.0333333		PUR	0.857143		PUR	0.15			PUR	0.097		PUR	0.241379		PUR	0.636364
PUR	0.586		PUR	0		PUR	0.714286		PUR	0.5			PUR	0.375		PUR	0.333333		PUR	0.16129
PUR	0.438		PUR	0.2		PUR	-0.612903		PUR	0.2			PUR	0.688		PUR	0.2		PUR	0.533333
PUR	0.6		PUR	0.366667		PUR	0.529412		PUR	0.35			PUR	0.4		PUR	0.333333		PUR	0.515152
PUR	0.375		PUR	0.2		PUR	0.875		PUR	0.1			PUR	0.097		PUR	0.133333		PUR	0.923077
PUR	0.333					PUR	0.147059		PUR	0.333333			PUR	0.133					PUR	0.566667
PUR	0.467		FRU	0.166667		PUR	0.0625		PUR	0.1			PUR	0.226		FRU	0.466667		PUR	0.441176
PUR	0.273		FRU	0.266667					PUR	0.478261			PUR	-0.2		FRU	0.6		PUR	0.351351
PUR	-0.4		FRU	0.366667		FRU	0.771429		PUR	-0.5			PUR	-0.29		FRU	0.166667		PUR	0.125
PUR	0.484		FRU	0		FRU	0.375		PUR	0			PUR	0.333		FRU	0.633333		PUR	0.5
PUR	0.375		FRU	0.137931		FRU	0.34375		PUR	0.3			PUR	0.4		FRU	0.166667		PUR	0.545455
PUR	0		FRU	0.166667		FRU	0.642857		PUR	-0.05			PUR	0.484		FRU	0.133333
PUR	0.533		FRU	0.233333		FRU	0.727273		PUR	0.25			PUR	0.375		FRU	0		FRU	0.344828
PUR	0.419		FRU	0.166667		FRU	0.666667		PUR	-0.3			PUR	0.6		FRU	0.0666667		FRU	0.264706
PUR	0.4		FRU	0.266667		FRU	0.37931		PUR	-0.3			PUR	0.586		FRU	-0.1		FRU	0.40625
PUR	0.429		FRU	0.2		FRU	0.451613		PUR	0.2			PUR	0.467		FRU	0.266667		FRU	0.2
PUR	-0.03		FRU	0.333333		FRU	0.72		PUR	0			PUR	0.333		FRU	-0.5		FRU	0.30303
PUR	0.067		FRU	0.0666667		FRU	0.5625		PUR	-0.2			PUR	-0.034		FRU	0.6		FRU	0.37931
PUR	0.273		FRU	0.2		FRU	0.6		PUR	-0.6			PUR	0.6		FRU	0.2		FRU	0.470588
PUR	0.613		FRU	0.333333		FRU	0.607143		PUR	-0.5			PUR	0.613		FRU	0.233333		FRU	0.470588
PUR	0.429		FRU	0.433333		FRU	0.793103		PUR	0.3			PUR	0.133		FRU	0.3		FRU	0.571429
PUR	0.613		FRU	-0.233333		FRU	0.516129		PUR	0.6			PUR	0.688		FRU	0.642857		FRU	0.166667
PUR	0.733		FRU	0.464286		FRU	0.448276		PUR	0.2			PUR	0.273		FRU	0.666667		FRU	0.655172
PUR	0.29		FRU	0.266667		FRU	0.571429		PUR	0.35			PUR	0.25		FRU	0.666667		FRU	0.647059
PUR	0.517		FRU	-0.166667		FRU	0.848485		PUR	0.1			PUR	0.6		FRU	0.4		FRU	0.447368
PUR	0.419		FRU	0.333333		FRU	0.435897		PUR	0.25			PUR	0.533		FRU	0.433333		FRU	0.655172
PUR	0.4					FRU	0.28		PUR	0.4			PUR	0.5					FRU	0.785714
			QUI	0.433333		FRU	0.375		PUR	0.45						QUI	0.266667		FRU	0.678571
FRU	0.935		QUI	-0.0333333		FRU	0.285714		PUR	0.05			FRU	0.455		QUI	0.233333		FRU	0.6
FRU	0.484		QUI	0.166667		FRU	0.210526		PUR	0			FRU	0.5		QUI	0.0333333		FRU	0.388889
FRU	0.871		QUI	0.366667					PUR	0.35			FRU	0.4		QUI	0.366667		FRU	0.470588
FRU	0.484		QUI	0.6		QUI	0.642857		PUR	-0.0454545			FRU	0.375		QUI	0.0666667		FRU	0.625
FRU	0.677		QUI	0.433333		QUI	0.482759		PUR	-0.037037			FRU	0.613		QUI	-0.133333		FRU	0.766667
FRU	-0.333		QUI	0.3		QUI	0.586207						FRU	0.548		QUI	0.0333333		FRU	0.5
FRU	0.677		QUI	0.0666667		QUI	0.6		FRU	0.1			FRU	0.6		QUI	0.266667		FRU	0.6
FRU	0.29		QUI	0.3		QUI	0.392857		FRU	-0.05			FRU	0.172		QUI	0.166667		FRU	0.666667
FRU	0.333		QUI	-0.3		QUI	0.666667		FRU	0.1			FRU	0.333		QUI	-0.233333		FRU	0.548387
FRU	0.8		QUI	0.433333		QUI	0.366667		FRU	0.15			FRU	0.267		QUI	0.266667		FRU	0.575758
FRU	0.312		QUI	0		QUI	0.647059		FRU	-0.105263			FRU	0.067		QUI	0.133333
FRU	0.067		QUI	-0.166667		QUI	0.62963		FRU	0.25			FRU	0.133		QUI	-0.0666667		QUI	0.30303
FRU	0.613		QUI	0.366667		QUI	0.241379		FRU	0			FRU	0.312		QUI	0.0666667		QUI	0.310345
FRU	0.133		QUI	0.0666667		QUI	0.53125		FRU	-0.1			FRU	0.533		QUI	0.233333		QUI	0.612903
FRU	0.548		QUI	-0.1		QUI	0.555556		FRU	0.55			FRU	0.312		QUI	0.4		QUI	0.535714
FRU	0.6		QUI	0.466667		QUI	0.382353		FRU	0.45			FRU	0.267		QUI	0.233333		QUI	0.5
FRU	0.867		QUI	0.0333333		QUI	0.638889		FRU	0.2			FRU	0.29		QUI	0.5		QUI	0.642857
FRU	0.4		QUI	0.366667		QUI	0.225806		FRU	0.4			FRU	0.161		QUI	0.166667		QUI	0.75
FRU	0.438		QUI	0.142857		QUI	0.625		FRU	0.1			FRU	0.419		QUI	0.133333		QUI	0.6875
FRU	0.419					QUI	0.393939		FRU	0.0952381			FRU	0					QUI	0.7
						QUI	0.7		FRU	-0.1									QUI	0.6
QUI	0.161					QUI	0.666667		FRU	0.55			QUI	0					QUI	0.457143
QUI	0.533					QUI	0.875		FRU	-0.05			QUI	0.067					QUI	0.774194
QUI	0.733					QUI	0.46875		FRU	0.35			QUI	0.133					QUI	0.83871
QUI	0.867					QUI	0.371429		FRU	0.4			QUI	-0.161					QUI	0.586207
QUI	0.333								FRU	0.4			QUI	-0.097					QUI	0.724138
QUI	0.548								FRU	0.35			QUI	0.172					QUI	0.545455
QUI	-0.2								FRU	0.625			QUI	0.4					QUI	0.724138
QUI	0.548								FRU	0.409091			QUI	-0.048					QUI	0.862069
QUI	0.6								FRU	-0.0416667			QUI	0.6					QUI	0.69697
QUI	0.467								FRU	0.736842			QUI	0.355					QUI	0.758621
QUI	0.8								FRU	-0.583333			QUI	0.333					QUI	0.189189
QUI	0.677								FRU	0.217391			QUI	0.2					QUI	0.475
QUI	0.355								FRU	0.272727			QUI	0.467					QUI	0.484848
QUI	0.29												QUI	0.355					QUI	0.472222
QUI	0.6								QUI	0			QUI	0.333					QUI	0.4
QUI	0.6								QUI	0.05			QUI	0.438					QUI	0.461538
QUI	0.667								QUI	-0.05			QUI	0.484
QUI	0.4								QUI	0.1			QUI	0.467
									QUI	0.45
									QUI	0.142857
									QUI	-0.2
									QUI	0.05
									QUI	0
									QUI	0.25
									QUI	0.142857
									QUI	-0.1
									QUI	-0.1
									QUI	0.3
									QUI	-0.15
									QUI	0.4
									QUI	0.8
									QUI	-0.15
									QUI	0.1
									QUI	0.25
									QUI	-0.238095
									QUI	0.272727
									QUI	0.375
									QUI	-0.421053
									QUI	0.5
									QUI	-0.428571
									QUI	0.434783
									QUI	-0.117647

## Sheet: Fig. 4
Fig. 4
Fig. 4A					Fig. 4B
Training	Test	AM Pref			Training	Test	AM Pref
AM Paired	PUR	0.75			AM Paired	PUR	0.05
AM Paired	PUR	0.3			AM Paired	PUR	0.0555556
AM Paired	PUR	0.368421			AM Paired	PUR	0.235294
AM Paired	PUR	0.2			AM Paired	PUR	0.214286
AM Paired	PUR	0.3			AM Paired	PUR	-0.111111
AM Paired	PUR	0.315789			AM Paired	PUR	-0.2
AM Paired	PUR	0.647059			AM Paired	PUR	0.352941
AM Paired	PUR	0.7			AM Paired	PUR	-0.352941
AM Paired	PUR	0.157895			AM Paired	PUR	0.1
AM Paired	PUR	-0.3			AM Paired	PUR	0.307692
AM Paired	PUR	0.444444			AM Paired	PUR	0.75
AM Paired	PUR	0.35			AM Paired	PUR	0
AM Paired	PUR	0.55			AM Paired	PUR	0.15
AM Paired	PUR	0.1			AM Paired	PUR	0.157895
AM Paired	PUR	0.4			AM Paired	PUR	0.5
AM Paired	PUR	0.25			AM Paired	PUR	-0.0526316
AM Paired	PUR	0.833333			AM Paired	PUR	-0.0555556
AM Paired	PUR	0.75			AM Paired	PUR	-0.105263
AM Paired	PUR	0.25			AM Paired	PUR	0.266667
AM Paired	PUR	0.684211			AM Paired	PUR	0.411765
AM Paired	PUR	0.263158
AM Paired	PUR	0.85			AM Unpaired	PUR	0.277778
AM Paired	PUR	0.166667			AM Unpaired	PUR	0.1
AM Paired	PUR	0.05			AM Unpaired	PUR	0.166667
AM Paired	PUR	-0.1			AM Unpaired	PUR	0.117647
AM Paired	PUR	0.5			AM Unpaired	PUR	0.714286
AM Paired	PUR	1			AM Unpaired	PUR	0.428571
AM Paired	PUR	0.473684			AM Unpaired	PUR	0.428571
AM Paired	PUR	0.380952			AM Unpaired	PUR	0.333333
AM Paired	PUR	0.25			AM Unpaired	PUR	0.388889
AM Paired	PUR	0.75			AM Unpaired	PUR	0.111111
AM Paired	PUR	0.210526			AM Unpaired	PUR	-0.0666667
AM Paired	PUR	0.619048			AM Unpaired	PUR	-0.1
AM Paired	PUR	0.555556			AM Unpaired	PUR	0.2
AM Paired	PUR	0.263158			AM Unpaired	PUR	0.105263
AM Paired	PUR	0.727273			AM Unpaired	PUR	-0.0625
AM Paired	PUR	0.190476			AM Unpaired	PUR	0.2
AM Paired	PUR	0			AM Unpaired	PUR	0
AM Paired	PUR	0.85			AM Unpaired	PUR	0.0555556
AM Paired	PUR	-0.210526			AM Unpaired	PUR	0.1
					AM Unpaired	PUR	0
AM Unpaired	PUR	0.15
AM Unpaired	PUR	0			AM Paired	QUI	-0.235294
AM Unpaired	PUR	0.35			AM Paired	QUI	-0.368421
AM Unpaired	PUR	0.368421			AM Paired	QUI	-0.333333
AM Unpaired	PUR	-0.105263			AM Paired	QUI	0.125
AM Unpaired	PUR	-0.368421			AM Paired	QUI	-0.238095
AM Unpaired	PUR	-0.235294			AM Paired	QUI	0.1
AM Unpaired	PUR	-0.375			AM Paired	QUI	-0.142857
AM Unpaired	PUR	-0.35			AM Paired	QUI	-0.214286
AM Unpaired	PUR	-0.3			AM Paired	QUI	0.133333
AM Unpaired	PUR	-0.263158			AM Paired	QUI	-0.136364
AM Unpaired	PUR	-0.684211			AM Paired	QUI	0.473684
AM Unpaired	PUR	-0.263158			AM Paired	QUI	0.55
AM Unpaired	PUR	-0.368421			AM Paired	QUI	0.1
AM Unpaired	PUR	-0.6			AM Paired	QUI	0.142857
AM Unpaired	PUR	-0.6			AM Paired	QUI	0.294118
AM Unpaired	PUR	-0.6			AM Paired	QUI	-0.333333
AM Unpaired	PUR	-0.4			AM Paired	QUI	-0.0454545
AM Unpaired	PUR	-0.5			AM Paired	QUI	-0.0666667
AM Unpaired	PUR	-0.5			AM Paired	QUI	-0.157895
AM Unpaired	PUR	-0.65			AM Paired	QUI	0.0625
AM Unpaired	PUR	-0.2
AM Unpaired	PUR	-0.333333			AM Unpaired	QUI	0.0588235
AM Unpaired	PUR	0.375			AM Unpaired	QUI	0.315789
AM Unpaired	PUR	0.238095			AM Unpaired	QUI	0.529412
AM Unpaired	PUR	-0.117647			AM Unpaired	QUI	0.5
AM Unpaired	PUR	-0.647059			AM Unpaired	QUI	0.363636
AM Unpaired	PUR	-0.578947			AM Unpaired	QUI	0.210526
AM Unpaired	PUR	-0.263158			AM Unpaired	QUI	0.266667
AM Unpaired	PUR	0			AM Unpaired	QUI	0.25
AM Unpaired	PUR	-0.25			AM Unpaired	QUI	0.277778
AM Unpaired	PUR	0.117647			AM Unpaired	QUI	0.388889
AM Unpaired	PUR	-0.05			AM Unpaired	QUI	0.714286
AM Unpaired	PUR	-0.529412			AM Unpaired	QUI	-0.238095
AM Unpaired	PUR	-0.25			AM Unpaired	QUI	0.866667
AM Unpaired	PUR	0			AM Unpaired	QUI	-0.263158
AM Unpaired	PUR	0			AM Unpaired	QUI	0.375
AM Unpaired	PUR	0.241379			AM Unpaired	QUI	0.75
AM Unpaired	PUR	-0.636364			AM Unpaired	QUI	0.375
AM Unpaired	PUR	0			AM Unpaired	QUI	0.277778
					AM Unpaired	QUI	0.380952
AM Paired	FRU	0.9			AM Unpaired	QUI	-0.266667
AM Paired	FRU	0.473684			AM Unpaired	QUI	0.3125
AM Paired	FRU	0.6
AM Paired	FRU	0.3
AM Paired	FRU	0.631579
AM Paired	FRU	0
AM Paired	FRU	0.111111
AM Paired	FRU	0.368421
AM Paired	FRU	0.421053
AM Paired	FRU	0.315789
AM Paired	FRU	0.55
AM Paired	FRU	0.0526316
AM Paired	FRU	0.5
AM Paired	FRU	-0.4
AM Paired	FRU	0.333333
AM Paired	FRU	-0.55
AM Paired	FRU	0.263158
AM Paired	FRU	0.578947
AM Paired	FRU	0.55
AM Paired	FRU	-0.2
AM Paired	FRU	0.25
AM Paired	FRU	0.45
AM Paired	FRU	0.25
AM Paired	FRU	0.222222
AM Paired	FRU	-0.0952381
AM Paired	FRU	0.625
AM Paired	FRU	0.2
AM Paired	FRU	0.6
AM Paired	FRU	0.0526316
AM Paired	FRU	0.210526
AM Paired	FRU	-0.45
AM Paired	FRU	-0.45
AM Paired	FRU	0.210526
AM Paired	FRU	0.222222
AM Paired	FRU	0.619048
AM Paired	FRU	-0.470588
AM Paired	FRU	0
AM Paired	FRU	0.157895
AM Paired	FRU	0.368421
AM Paired	FRU	0.473684
AM Unpaired	FRU	0.421053
AM Unpaired	FRU	0.157895
AM Unpaired	FRU	0.65
AM Unpaired	FRU	0.4
AM Unpaired	FRU	0.388889
AM Unpaired	FRU	0.315789
AM Unpaired	FRU	0.3
AM Unpaired	FRU	0.15
AM Unpaired	FRU	0.75
AM Unpaired	FRU	0.05
AM Unpaired	FRU	0.75
AM Unpaired	FRU	0.1
AM Unpaired	FRU	0.1
AM Unpaired	FRU	0.157895
AM Unpaired	FRU	0.428571
AM Unpaired	FRU	0.210526
AM Unpaired	FRU	0.631579
AM Unpaired	FRU	-0.1
AM Unpaired	FRU	0.55
AM Unpaired	FRU	0.35
AM Unpaired	FRU	0
AM Unpaired	FRU	-0.3
AM Unpaired	FRU	0.1
AM Unpaired	FRU	0.1
AM Unpaired	FRU	-0.0526316
AM Unpaired	FRU	0.277778
AM Unpaired	FRU	0.105263
AM Unpaired	FRU	0.421053
AM Unpaired	FRU	-0.52381
AM Unpaired	FRU	-0.0714286
AM Unpaired	FRU	-0.222222
AM Unpaired	FRU	-0.315789
AM Unpaired	FRU	0.047619
AM Unpaired	FRU	-0.136364
AM Unpaired	FRU	0.722222
AM Unpaired	FRU	-0.25
AM Unpaired	FRU	0.0526316
AM Unpaired	FRU	-0.2
AM Unpaired	FRU	0.333333
AM Unpaired	FRU	-0.0526316

## Sheet: Fig. 5
Fig. 5
Group	Startle Difference Score
paired	39
paired	1
paired	42
paired	71
paired	53
paired	29
paired	120
paired	57
paired	-15
paired	67
paired	137
paired	37
unpaired	-29
unpaired	-56
unpaired	-100
unpaired	-52
unpaired	-21
unpaired	-38
unpaired	-50
unpaired	-100
unpaired	-47
unpaired	-45
baseline	19
baseline	-47
baseline	-7
baseline	-22
baseline	-37
baseline	63
baseline	9
baseline	11
baseline	-10
baseline	-23
baseline	-42
baseline	9
baseline	-7
